# Supplementary material
Source: HighWire-hosted journal article supplement (http://www.cmaj.ca/highwire/filestream/58719/field_highwire_adjunct_files/1/insulin-yu-2-at.pdf)

**Appendix 2 (as supplied by the authors): Prisma Flow Diagram**

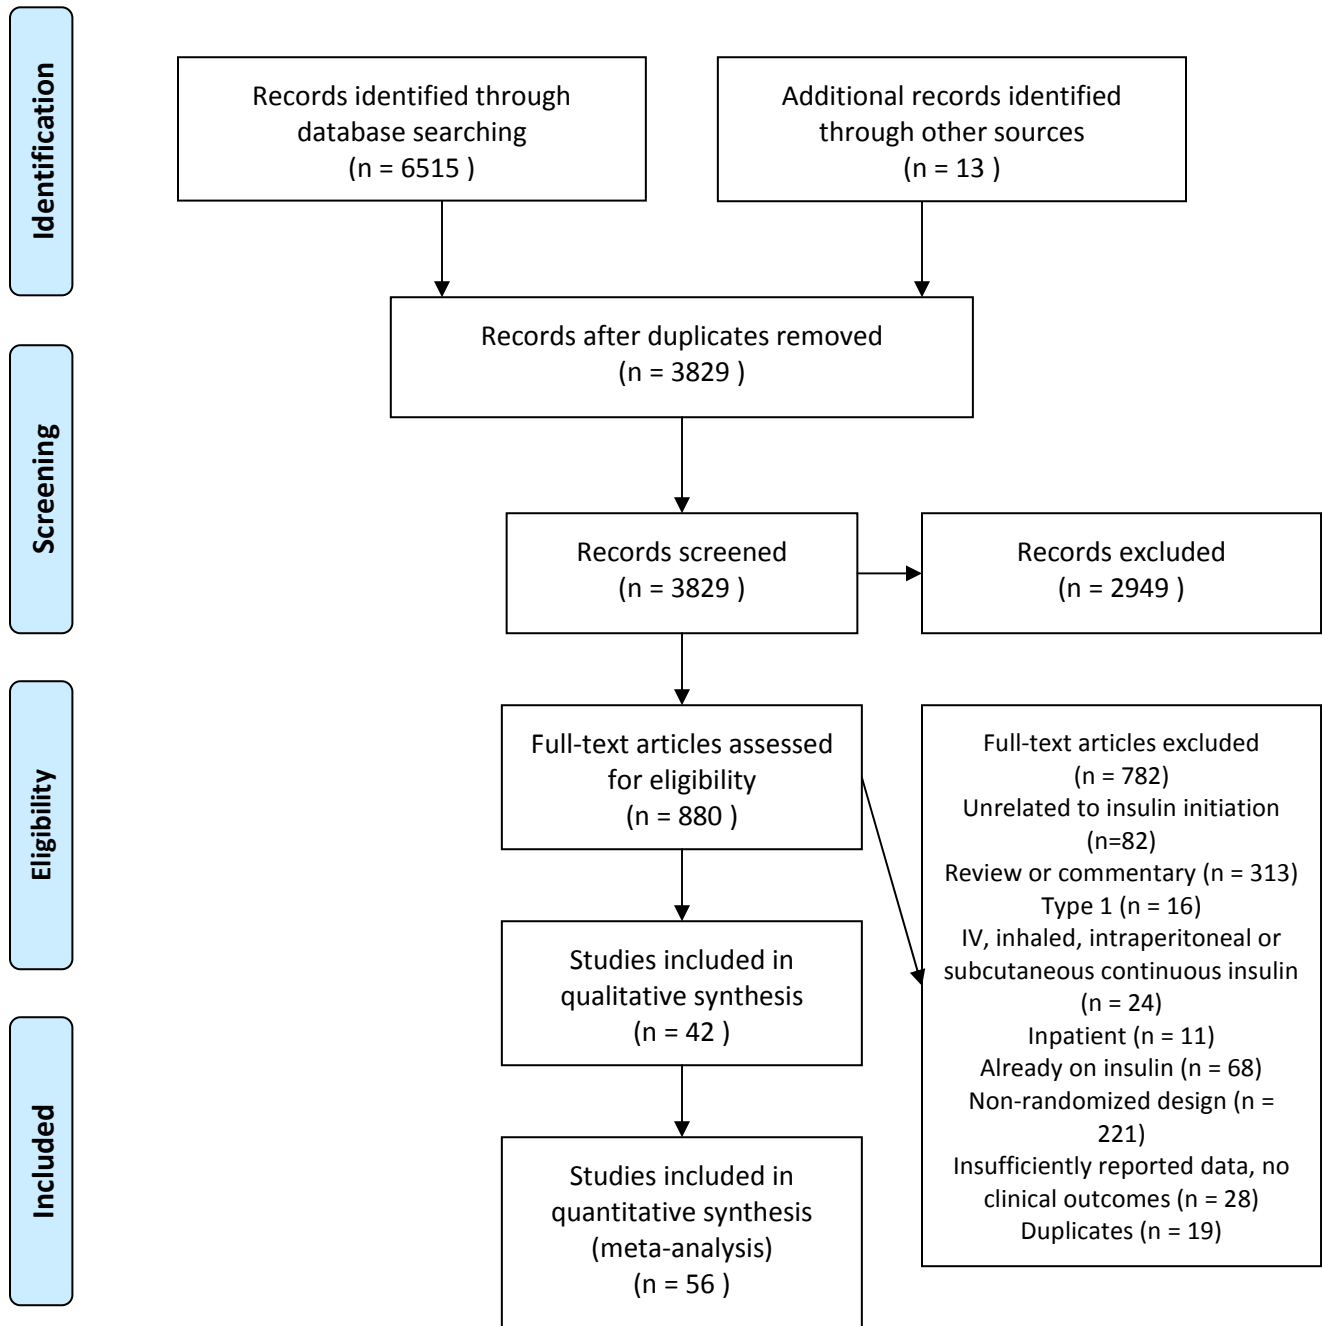

Supplement: insulin-yu-2-at.pdf [file insulin-yu-2-at.pdf]
